# Supplementary material
Source: PubMed Central journal article supplement (PMC7364663)
Supplement: NIHMS1596460-supplement-1.pdf [file NIHMS1596460-supplement-1.pdf]

## Supplementary Materials

### Transarterial Delivery of a Biodegradable Single-Agent Theranostic Nanoprobe for Liver Tumor Imaging and Combinatorial Phototherapy

#### Nanoparticle preparation and photo-theranostic functions

The SiNc-TN formulation was prepared employing a water addition/solvent evaporation method by encapsulating SiNc (0.3 mg/mL) into the polymer PEG-PCL (10 mg/mL). According to cryogenic transmission electron microscopy (cryo-TEM), SiNc-TN are spherical and highly uniform with a size of ~20 nm (Fig S1A). The formulated SiNc-TN demonstrated strong NIR fluorescence as confirmed by Fluobeam® 800 (Fig S1B), enabling *in vivo* imaging using the same device. Under 785 nm continuous NIR laser light (0.6 W/cm<sup>2</sup>), SiNc-TN in aqueous solution at a concentration of 0.3 mg/mL produced heat reaching 45 °C in 4 min and 47 °C in 6 min (Fig S1C). In addition, the same formulation was capable of production of various reactive oxygen species including singlet oxygen (<sup>1</sup>O<sub>2</sub>), demonstrating a ~20-fold increase when compared to the saline control (Fig S1D).

#### Solution Studies

**Singlet Oxygen <sup>1</sup>O<sub>2</sub> Generation.** As previously reported, <sup>1</sup>O<sub>2</sub> production was measured by SOSG assay in a 96 well plate (34, 35). Corresponding wells were treated for 5 min at 785 nm and 0.6

W/cm<sup>2</sup> while the dark controls were protected from light. Instantly, the samples were evaluated on Varian Cary Eclipse R3896 fluorescence spectrophotometer using excitation/emission of 504/525 nm.

**Photothermal Effect.** A 785 nm laser diode (CW, ThorLabs, Newton, NJ, 0.6 W/cm<sup>2</sup>) was used. For temperature increase evaluation, 300  $\mu$ L of SiNc-TN aqueous solutions (0.3 mg/mL) in the 500  $\mu$ L vials was exposed for 20 min to the NIR laser. The thermocouple was used to record temperature at selected time points. As a control, water was tested under the same irradiation conditions.

**Figures and Figure legends:**

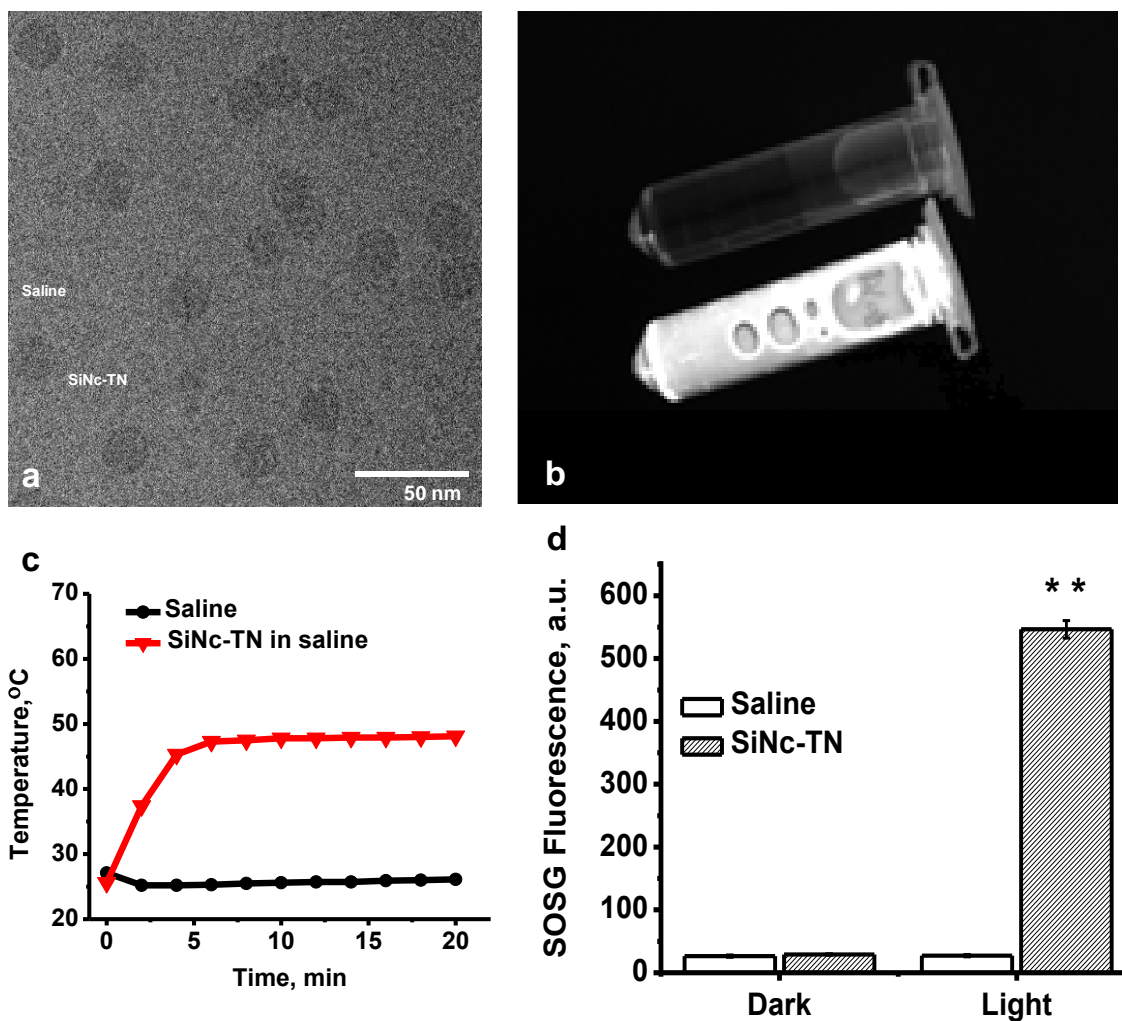

**Figure S1.** Theranostic properties in solution of SiNc-TN: A, cryo-TEM image of SiNc-TN; B, NIR fluorescence image of SiNc-TN solution (0.3 mg/ml of SiNc) recorded with Fluobeam® 800; C, temperature profiles of saline (black) and SiNc-TN (0.3 mg/mL) aqueous solution (red) exposed to NIR light (785 nm, 0.6 W/cm<sup>2</sup>); D, singlet oxygen generation by SiNc-TN (0.05 mg/mL) in the

absence (dark) and presence (light) of NIR light (785 nm, 0.6 W/cm<sup>2</sup>, 5 min). \*\*P < 0.005 when compared with saline as the control.

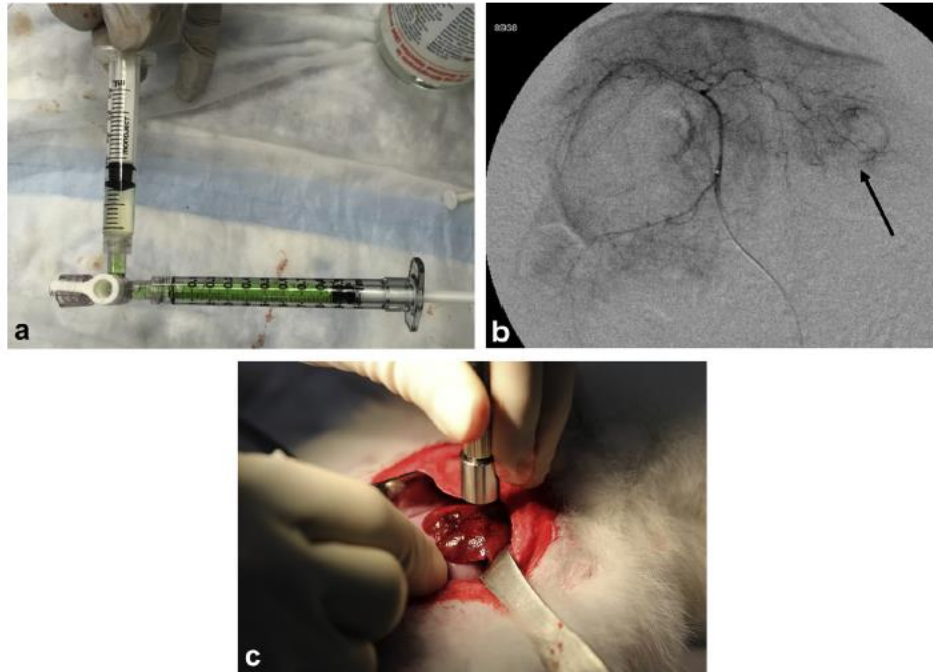

**Figure S2.** Transarterial nanoparticle delivery. A, Nanoparticle solution (0.3mg/mL) in syringe for transarterial delivery. B, Digital subtraction angiogram of hepatic arteries with a peripherally hypervascular tumor in the left lobe (arrow). C, Intraoperative photograph demonstrating the photoablation procedure under laser stimulation (left hand) with an implanted fiberoptic temperature probe (right hand).

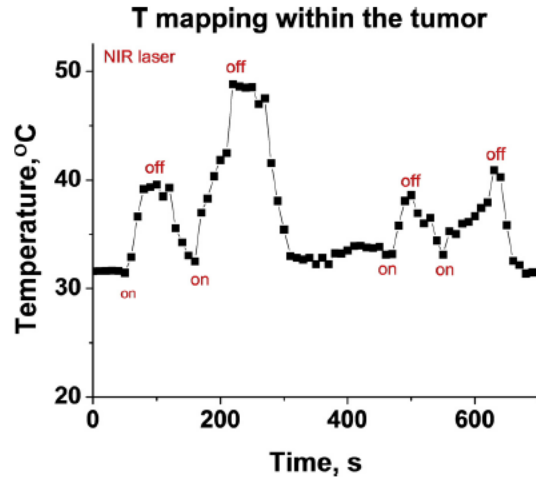

**Figure S3.** Temperature probing within the liver tumor implanted in the rabbit injected with SiNc-TN via transarterial delivery.
